# Supplementary material
Source: Springer Nature journal article supplement (https://www.springermedizin.de/resource/supplementary/13069_2011_62_MOESM2_ESM.pdf/9659702)

CD45

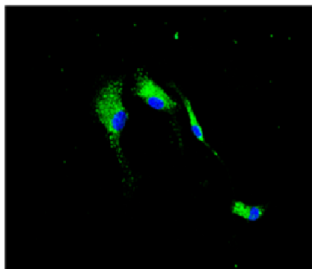

Collagen I

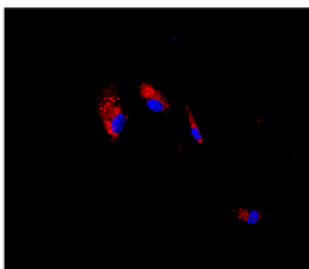

CD45 & Collagen I

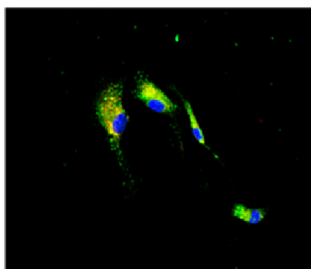

CCR2

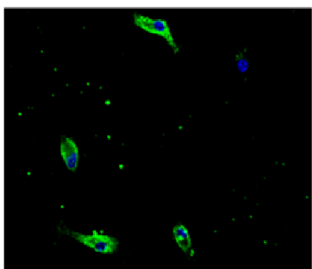

CD45

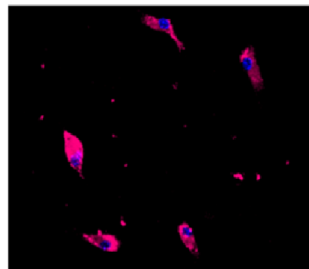

CCR2 & CD45

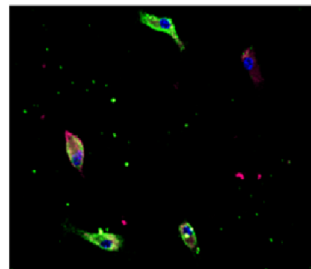

CCR2

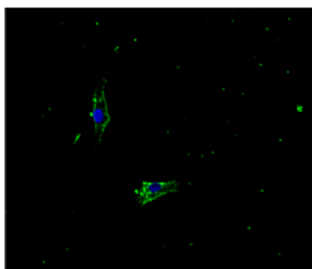

Collagen I

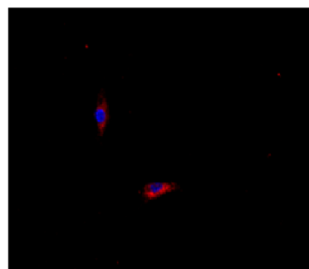

CCR2 & Collagen I

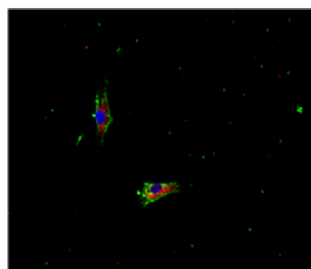

Chicken IgY

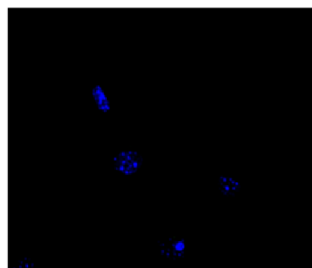

Rabbit IgG

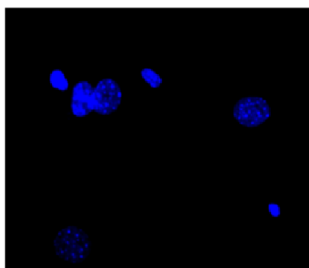

Rat IgG<sub>2b</sub>

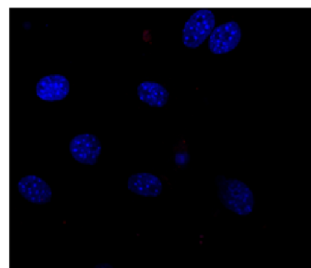

Supplement: MOESM2 [file 9659702]
